# Supplementary material for: The Effect of Clozapine and Novel Glutamate Modulator JNJ-46356479 on Nitrosative Stress in a Postnatal Murine Ketamine Model of Schizophrenia
Source: MDPI journal article supplement (doi:10.3390/ijms24021022), 2023-01-05
Supplement: s1 [file s1]

**Supplementary Table S1.***Overview of the study design and treatment groups.*

| Group        | N         | Treatment conditions        | PND 7, 9 and<br>11    | PND 35-60                 | Identifier |
|--------------|-----------|-----------------------------|-----------------------|---------------------------|------------|
| Group 1      | 6         | Control                     | Vehicle 1             | Vehicle 2                 | Veh+Veh    |
| Group 2      | 7         | Control + Clozapine         | Vehicle 1             | Clozapine<br>(10mg/kg)    | Veh+CLZ    |
| Group 3      | 6         | Control + JNJ-<br>46356479  | Vehicle 1             | JNJ-46356479<br>(10mg/kg) | Veh+JNJ    |
| Group 4      | 6         | Ketamine                    | Ketamine<br>(30mg/kg) | Vehicle 2                 | Ket+Veh    |
| Group 5      | 6         | Ketamine + Clozapine        | Ketamine<br>(30mg/kg) | Clozapine<br>(10mg/kg)    | Ket+CLZ    |
| Group 6      | 6         | Ketamine + JNJ-<br>46356479 | Ketamine<br>(30mg/kg) | JNJ-46356479<br>(10mg/kg) | Ket+JNJ    |
| <b>Total</b> | <b>37</b> |                             |                       |                           |            |

On postnatal days (PNDs) 7, 9 and 11 the animals were treated with either saline or ketamine. On PND 35 to 60 both saline and ketamine mice received either vehicle, clozapine or JNJ-46356479. (CLZ, clozapine; JNJ, JNJ46356479; Ket, ketamine; Veh, vehicle)
