# Supplementary material for: The Effect of Clozapine and Novel Glutamate Modulator JNJ-46356479 on Nitrosative Stress in a Postnatal Murine Ketamine Model of Schizophrenia
Source: MDPI journal article supplement (doi:10.3390/ijms24021022), 2023-01-05
Supplement: s1 [file s1]

**Supplementary Table S2.** Densitometry arbitrary units of protein levels of eNOS, nNOS and iNOS isoforms in PFC and HPC.

|            | eNOS    |        |   | nNOS    |        |   | iNOS    |        |   |
|------------|---------|--------|---|---------|--------|---|---------|--------|---|
| <b>PFC</b> | Average | SEM    | p | Average | SEM    | p | Average | SEM    | p |
| Veh+veh    | 100     | 17.41  | - | 100     | 15.49  | - | 100     | 22.77  | - |
| Veh+CLZ    | 351.78  | 145.35 | * | 438.22  | 246.23 | * | 235.17  | 84.80  | - |
| Veh+JNJ    | 66.86   | 17.96  | * | 112.20  | 52.09  | - | 383.05  | 189.59 | - |
|            | eNOS    |        |   | nNOS    |        |   | iNOS    |        |   |
|            | Average | SEM    | p | Average | SEM    | p | Average | SEM    | p |
| <b>HPC</b> |         |        |   |         |        |   |         |        |   |
| Veh+veh    | 100     | 13.77  | - | 100     | 12.58  | - | 100     | 23.91  | - |
| Veh+CLZ    | 148.00  | 68.07  | - | 118.08  | 16.48  | - | 99.87   | 14.50  | - |
| Veh+JNJ    | 370.29  | 214.79 | - | 194.65  | 63.04  | - | 189.54  | 75.76  | - |

eNOS, endothelial nitric oxide synthase; HPC, hippocampus; iNOS, inducible nitric oxide synthase; nNOS, neuronal nitric oxide synthase; PFC, prefrontal cortex; SEM, standard error mean; \* p<0.05.
